# Supplementary material
Source: MDPI journal article supplement (https://www.mdpi.com/2624-8549/5/1/21)
Supplement: s1 [file s1]

**Electronic Supplementary Material for:**

**Theoretical Study of Excited-State Dynamics of  
Hypercoordinated Carbon Molecule**

Probal Nag and Sivaranjana Reddy Vennapusa\*

School of Chemistry, Indian Institute of Science Education and Research  
Thiruvananthapuram, Maruthamala PO, Vithura, Thiruvananthapuram 695551, India.  
Email: siva@iisertvm.ac.in

## Table of contents

**Table S1:** Harmonic vibrational frequencies of 1,8-dimethoxy-9-dimethoxymethylanthracene monocation computed at B3LYP/cc-pVDZ level of theory.

**Table S2:** Ground-state ( $S_0$ ) equilibrium geometry of 1,8-dimethoxy-9-dimethoxymethylanthracene monocation optimized at B3LYP/cc-pVDZ level of theory.

**Table S3:** Linear intrastate coupling parameters ( $\kappa$ ) of 1,8-dimethoxy-9-dimethoxymethylanthracene monocation computed at TD-CAM-B3LYP/aug-cc-pVDZ level of theory.

**Table S4:** Linear interstate coupling parameters ( $\lambda$ ) of 1,8-dimethoxy-9-dimethoxymethylanthracene monocation computed at TD-CAM-B3LYP/aug-cc-pVDZ level of theory.

**Table S5:** MCTDH details of  $S_1$ - $S_2$  vibronic dynamics of 1,8-dimethoxy-9-dimethoxymethylanthracene monocation.

**Table S6:**  $S_1$ - $S_2$  MECI geometry of 1,8-dimethoxy-9-dimethoxymethylanthracene monocation optimized at TD-CAM-B3LYP/aug-cc-pVDZ level of theory using GRRM.

**Figure S1:** Natural transition orbitals of  $S_1$  and  $S_2$  states of 1,8-dimethoxy-9-dimethoxymethylanthracene monocation.

**Table S1:** Symmetry and harmonic frequency ( $\omega$ ) of the vibrational modes of 1,8-dimethoxy-9-dimethoxymethylantracene monocation at B3LYP/cc-pVDZ level of theory.

| No.(Sym.)      | Freq (in $\text{cm}^{-1}$ ) | No.(Sym.)       | Freq (in $\text{cm}^{-1}$ ) |
|----------------|-----------------------------|-----------------|-----------------------------|
| $\nu_1(a2)$    | 31.6031                     | $\nu_{61}(b2)$  | 1148.5701                   |
| $\nu_2(a2)$    | 44.5843                     | $\nu_{62}(b1)$  | 1155.3476                   |
| $\nu_3(b1)$    | 45.3309                     | $\nu_{63}(a2)$  | 1155.3691                   |
| $\nu_4(b1)$    | 74.0248                     | $\nu_{64}(a1)$  | 1155.5211                   |
| $\nu_5(b2)$    | 77.3328                     | $\nu_{65}(a1)$  | 1175.1323                   |
| $\nu_6(a2)$    | 83.6973                     | $\nu_{66}(b2)$  | 1179.0624                   |
| $\nu_7(b1)$    | 103.1632                    | $\nu_{67}(b1)$  | 1186.7340                   |
| $\nu_8(a2)$    | 113.7757                    | $\nu_{68}(a1)$  | 1190.6276                   |
| $\nu_9(a1)$    | 128.2130                    | $\nu_{69}(b2)$  | 1192.4994                   |
| $\nu_{10}(b2)$ | 129.7124                    | $\nu_{70}(a1)$  | 1211.5409                   |
| $\nu_{11}(b1)$ | 158.6749                    | $\nu_{71}(b2)$  | 1218.9835                   |
| $\nu_{12}(a1)$ | 180.6207                    | $\nu_{72}(b2)$  | 1276.6288                   |
| $\nu_{13}(b2)$ | 186.6579                    | $\nu_{73}(a1)$  | 1284.7263                   |
| $\nu_{14}(a2)$ | 187.9394                    | $\nu_{74}(a1)$  | 1303.7601                   |
| $\nu_{15}(b2)$ | 226.2238                    | $\nu_{75}(a1)$  | 1349.2596                   |
| $\nu_{16}(b1)$ | 231.2004                    | $\nu_{76}(b2)$  | 1357.1164                   |
| $\nu_{17}(a2)$ | 238.9861                    | $\nu_{77}(b2)$  | 1383.3315                   |
| $\nu_{18}(a2)$ | 250.8127                    | $\nu_{78}(b1)$  | 1395.1641                   |
| $\nu_{19}(b1)$ | 288.2786                    | $\nu_{79}(a1)$  | 1412.4506                   |
| $\nu_{20}(a1)$ | 307.5310                    | $\nu_{80}(b2)$  | 1415.1776                   |
| $\nu_{21}(b2)$ | 317.2665                    | $\nu_{81}(a1)$  | 1443.3354                   |
| $\nu_{22}(a1)$ | 321.7253                    | $\nu_{82}(a1)$  | 1448.6745                   |
| $\nu_{23}(a2)$ | 324.0607                    | $\nu_{83}(b2)$  | 1449.2728                   |
| $\nu_{24}(b1)$ | 328.3286                    | $\nu_{84}(b1)$  | 1450.4329                   |
| $\nu_{25}(a1)$ | 402.9798                    | $\nu_{85}(a1)$  | 1454.4699                   |
| $\nu_{26}(b1)$ | 462.2537                    | $\nu_{86}(a2)$  | 1460.2585                   |
| $\nu_{27}(a1)$ | 471.6552                    | $\nu_{87}(b1)$  | 1461.1050                   |
| $\nu_{28}(a2)$ | 501.9065                    | $\nu_{88}(b2)$  | 1463.0356                   |
| $\nu_{29}(b2)$ | 513.5067                    | $\nu_{89}(a2)$  | 1463.8208                   |
| $\nu_{30}(b2)$ | 518.0445                    | $\nu_{90}(b2)$  | 1467.5341                   |
| $\nu_{31}(b1)$ | 547.9998                    | $\nu_{91}(a1)$  | 1474.7227                   |
| $\nu_{32}(a1)$ | 552.3039                    | $\nu_{92}(b2)$  | 1476.5879                   |
| $\nu_{33}(b2)$ | 585.2234                    | $\nu_{93}(a1)$  | 1490.1824                   |
| $\nu_{34}(a2)$ | 613.3470                    | $\nu_{94}(a1)$  | 1504.7861                   |
| $\nu_{35}(b1)$ | 615.5136                    | $\nu_{95}(a1)$  | 1520.8748                   |
| $\nu_{36}(a1)$ | 615.8252                    | $\nu_{96}(b1)$  | 1560.8967                   |
| $\nu_{37}(b1)$ | 666.1830                    | $\nu_{97}(b2)$  | 1573.7883                   |
| $\nu_{38}(a1)$ | 674.5219                    | $\nu_{98}(a1)$  | 1608.6923                   |
| $\nu_{39}(b2)$ | 680.6648                    | $\nu_{99}(b2)$  | 1624.7587                   |
| $\nu_{40}(a2)$ | 755.8470                    | $\nu_{100}(b2)$ | 1666.6184                   |
| $\nu_{41}(b2)$ | 775.1942                    | $\nu_{101}(a1)$ | 1677.2264                   |
| $\nu_{42}(b1)$ | 777.3568                    | $\nu_{102}(b2)$ | 3028.0664                   |
| $\nu_{43}(a1)$ | 783.6739                    | $\nu_{103}(a1)$ | 3028.1806                   |
| $\nu_{44}(a2)$ | 819.0080                    | $\nu_{104}(b1)$ | 3077.5487                   |
| $\nu_{45}(b1)$ | 823.0350                    | $\nu_{105}(a1)$ | 3078.2887                   |
| $\nu_{46}(b1)$ | 892.9238                    | $\nu_{106}(a2)$ | 3108.6999                   |
| $\nu_{47}(a2)$ | 900.6654                    | $\nu_{107}(b1)$ | 3108.7588                   |
| $\nu_{48}(a1)$ | 925.4513                    | $\nu_{108}(b2)$ | 3161.2038                   |
| $\nu_{49}(b2)$ | 932.1095                    | $\nu_{109}(a1)$ | 3161.2348                   |
| $\nu_{50}(b1)$ | 940.8668                    | $\nu_{110}(a2)$ | 3183.6643                   |
| $\nu_{51}(b1)$ | 956.3633                    | $\nu_{111}(b2)$ | 3184.5817                   |
| $\nu_{52}(b2)$ | 983.2546                    | $\nu_{112}(a1)$ | 3185.2071                   |
| $\nu_{53}(a2)$ | 998.9667                    | $\nu_{113}(b2)$ | 3194.7933                   |
| $\nu_{54}(b1)$ | 1000.9021                   | $\nu_{114}(a1)$ | 3195.2200                   |
| $\nu_{55}(a1)$ | 1001.1289                   | $\nu_{115}(b1)$ | 3200.6384                   |
| $\nu_{56}(a1)$ | 1092.6004                   | $\nu_{116}(a1)$ | 3200.7559                   |
| $\nu_{57}(b2)$ | 1096.9290                   | $\nu_{117}(b2)$ | 3210.2171                   |
| $\nu_{58}(b2)$ | 1114.9977                   | $\nu_{118}(a1)$ | 3210.4486                   |
| $\nu_{59}(a1)$ | 1125.5836                   | $\nu_{119}(a1)$ | 3227.3118                   |
| $\nu_{60}(a2)$ | 1141.9471                   | $\nu_{120}(b2)$ | 3227.3324                   |

**Table S2:** Ground-state ( $S_0$ ) equilibrium geometry of 1,8-dimethoxy-9-dimethoxymethylanthracene monocation optimized at B3LYP/cc-pVDZ level of theory.

| Atom | Coordinates (Angstrom) |             |             |
|------|------------------------|-------------|-------------|
|      | X                      | Y           | Z           |
| C    | 0.00000000             | 3.69339027  | 0.73100205  |
| C    | 0.00000000             | 2.52368218  | 0.00507500  |
| C    | 0.00000000             | 1.23813209  | 0.65701905  |
| C    | 0.00000000             | 1.22775209  | 2.10079315  |
| C    | 0.00000000             | 2.46323218  | 2.82303920  |
| C    | 0.00000000             | 3.65741226  | 2.15422315  |
| C    | -0.00000000            | -0.00000000 | -0.04338400 |
| C    | -0.00000000            | 0.00000000  | 2.77211820  |
| C    | -0.00000000            | -1.22775209 | 2.10079315  |
| C    | -0.00000000            | -1.23813209 | 0.65701905  |
| C    | -0.00000000            | -2.52368218 | 0.00507500  |
| C    | -0.00000000            | -3.69339027 | 0.73100205  |
| C    | -0.00000000            | -3.65741226 | 2.15422315  |
| C    | -0.00000000            | -2.46323218 | 2.82303920  |
| H    | 0.00000000             | 4.65768733  | 0.22498402  |
| H    | 0.00000000             | 2.42983018  | 3.91362028  |
| H    | 0.00000000             | 4.59995133  | 2.70390820  |
| H    | -0.00000000            | 0.00000000  | 3.86466528  |
| H    | -0.00000000            | -4.65768733 | 0.22498402  |
| H    | -0.00000000            | -4.59995133 | 2.70390820  |
| H    | -0.00000000            | -2.42983018 | 3.91362028  |
| O    | -0.00000000            | -2.45267918 | -1.35743910 |
| O    | 0.00000000             | 2.45267918  | -1.35743910 |
| C    | 0.00000000             | -0.00000000 | -1.53907111 |
| O    | -1.06578308            | -0.00000000 | -2.26320716 |
| O    | 1.06578308             | -0.00000000 | -2.26320716 |
| C    | -2.38270817            | 0.00000000  | -1.64403812 |
| H    | -3.07907322            | 0.00000000  | -2.48883318 |
| H    | -2.50578518            | -0.90557606 | -1.03742607 |
| H    | -2.50578518            | 0.90557606  | -1.03742607 |
| C    | 2.38270817             | -0.00000000 | -1.64403812 |
| H    | 2.50578518             | 0.90557606  | -1.03742607 |
| H    | 2.50578518             | -0.90557606 | -1.03742607 |
| H    | 3.07907322             | -0.00000000 | -2.48883318 |
| C    | -0.00000000            | -3.65959426 | -2.12714615 |
| H    | -0.00000000            | -3.34332924 | -3.17729023 |
| H    | 0.90144907             | -4.25843131 | -1.91874314 |
| H    | -0.90144907            | -4.25843131 | -1.91874314 |
| C    | 0.00000000             | 3.65959426  | -2.12714615 |
| H    | 0.00000000             | 3.34332924  | -3.17729023 |
| H    | -0.90144907            | 4.25843131  | -1.91874314 |
| H    | 0.90144907             | 4.25843131  | -1.91874314 |

**Table S3:** Linear intrastate coupling parameters ( $\kappa$ ) (in eV) for the singlet electronic states of 1,8-dimethoxy-9-dimethoxymethylanthracene monocation obtained at TD-CAM-B3LYP/aug-cc-pVDZ level of theory. Excitation strength ( $\kappa^2/2\omega^2$ ) obtained for each vibrational mode is shown in parenthesis.

| a <sub>1</sub> mode<br>(Freq, eV) | $\kappa^{S_1}$   | $\kappa^{S_2}$   |
|-----------------------------------|------------------|------------------|
| $\nu_9$ (0.0159)                  | 0.0089 (0.1578)  | 0.0526 (5.4779)  |
| $\nu_{12}$ (0.0224)               | -0.0027 (0.0074) | 0.0036 (0.0130)  |
| $\nu_{20}$ (0.0381)               | 0.0052 (0.0093)  | -0.0094 (0.0306) |
| $\nu_{22}$ (0.0399)               | 0.0099 (0.0305)  | 0.0041 (0.0052)  |
| $\nu_{25}$ (0.0500)               | -0.0429 (0.3689) | -0.0186 (0.0688) |
| $\nu_{27}$ (0.0585)               | 0.0232 (0.0789)  | -0.0203 (0.0600) |
| $\nu_{32}$ (0.0685)               | -0.0005 (0.0000) | 0.0376 (0.1507)  |
| $\nu_{36}$ (0.0764)               | -0.0419 (0.1505) | -0.0319 (0.0873) |
| $\nu_{38}$ (0.0836)               | -0.0025 (0.0004) | 0.0319 (0.0728)  |
| $\nu_{43}$ (0.0972)               | -0.0175 (0.0162) | 0.0384 (0.0780)  |
| $\nu_{48}$ (0.1147)               | -0.0092 (0.0032) | -0.0063 (0.0015) |
| $\nu_{55}$ (0.1241)               | -0.0033 (0.0003) | -0.0232 (0.0174) |
| $\nu_{56}$ (0.1355)               | -0.0369 (0.0371) | -0.0250 (0.0170) |
| $\nu_{59}$ (0.1396)               | -0.0196 (0.0099) | 0.0896 (0.2061)  |
| $\nu_{64}$ (0.1433)               | 0.0273 (0.0181)  | 0.0836 (0.1703)  |
| $\nu_{65}$ (0.1457)               | -0.0111 (0.0029) | 0.0316 (0.0235)  |
| $\nu_{68}$ (0.1476)               | 0.0088 (0.0018)  | -0.0115 (0.0030) |
| $\nu_{70}$ (0.1502)               | -0.0314 (0.0219) | -0.0172 (0.0065) |
| $\nu_{73}$ (0.1593)               | 0.0131 (0.0034)  | 0.0625 (0.0770)  |
| $\nu_{74}$ (0.1616)               | 0.0863 (0.1425)  | -0.0539 (0.0556) |
| $\nu_{75}$ (0.1673)               | -0.0525 (0.0493) | -0.0709 (0.0898) |
| $\nu_{79}$ (0.1751)               | -0.0778 (0.0986) | -0.2535 (1.0478) |
| $\nu_{81}$ (0.1790)               | 0.1580 (0.3896)  | 0.0553 (0.0478)  |
| $\nu_{82}$ (0.1796)               | -0.0473 (0.0346) | -0.0066 (0.0007) |
| $\nu_{85}$ (0.1803)               | 0.0326 (0.0163)  | -0.0012 (0.0000) |
| $\nu_{91}$ (0.1828)               | 0.0096 (0.0014)  | 0.0277 (0.0115)  |
| $\nu_{93}$ (0.1848)               | -0.0444 (0.0288) | 0.0278 (0.0113)  |
| $\nu_{94}$ (0.1866)               | -0.0333 (0.0160) | 0.0229 (0.0075)  |
| $\nu_{95}$ (0.1886)               | -0.0348 (0.0170) | -0.2218 (0.6914) |
| $\nu_{98}$ (0.1995)               | -0.1887 (0.4473) | -0.1676 (0.3530) |
| $\nu_{101}$ (0.2080)              | 0.0044 (0.0002)  | -0.0027 (0.0001) |
| $\nu_{103}$ (0.3754)              | 0.0041 (0.0001)  | 0.0001 (0.0000)  |
| $\nu_{105}$ (0.3817)              | 0.0001 (0.0000)  | 0.0314 (0.0034)  |
| $\nu_{109}$ (0.3919)              | 0.0000 (0.0000)  | -0.0047 (0.0001) |
| $\nu_{112}$ (0.3949)              | 0.0102 (0.0003)  | 0.0003 (0.0000)  |
| $\nu_{114}$ (0.3962)              | 0.0007 (0.0000)  | -0.0009 (0.0000) |
| $\nu_{116}$ (0.3968)              | 0.0020 (0.0000)  | -0.0112 (0.0004) |
| $\nu_{118}$ (0.3980)              | 0.0014 (0.0000)  | -0.0005 (0.0000) |
| $\nu_{119}$ (0.4001)              | 0.0095 (0.0003)  | 0.0047 (0.0001)  |

**Table S4:** Linear interstate coupling parameters ( $\lambda$ ) (in eV) computed along  $a_2$  modes for singlet electronic states of 1,8-dimethoxy-9-dimethoxymethylanthracene monocation obtained at TD-CAM-B3LYP/aug-cc-pVDZ level of theory. Excitation strength ( $\lambda^2/2\omega^2$ ) obtained for each vibrational mode is shown in paranthesis.

| $a_2$ mode<br>(Freq, eV) | $\lambda_{S_1-S_2}$ |
|--------------------------|---------------------|
| $\nu_1$ (0.0039)         | 0.0812 (216.4904)   |
| $\nu_2$ (0.0055)         | 0.0143 (3.3728)     |
| $\nu_6$ (0.0104)         | 0.0042 (0.0813)     |
| $\nu_8$ (0.0141)         | 0.0323 (2.6190)     |
| $\nu_{14}$ (0.0233)      | 0.0187 (0.3215)     |
| $\nu_{17}$ (0.0296)      | 0.0721 (2.9678)     |
| $\nu_{18}$ (0.0311)      | 0.0019 (0.0019)     |
| $\nu_{23}$ (0.0402)      | 0.0188 (0.1099)     |
| $\nu_{28}$ (0.0622)      | 0.0201 (0.0520)     |
| $\nu_{34}$ (0.0760)      | 0.0277 (0.0663)     |
| $\nu_{40}$ (0.0937)      | 0.0382 (0.0830)     |
| $\nu_{44}$ (0.1015)      | 0.0281 (0.0384)     |
| $\nu_{47}$ (0.1117)      | 0.0312 (0.0389)     |
| $\nu_{53}$ (0.1239)      | 0.0264 (0.0227)     |
| $\nu_{60}$ (0.1416)      | —                   |
| $\nu_{63}$ (0.1432)      | —                   |
| $\nu_{86}$ (0.1810)      | 0.0098 (0.0015)     |
| $\nu_{89}$ (0.1815)      | —                   |
| $\nu_{106}$ (0.3854)     | —                   |
| $\nu_{110}$ (0.3947)     | —                   |

**Table S5:** MCTDH details of normal modes combination, size of the primitive and single particle bases used in the  $S_1$ - $S_2$  vibronic dynamics of 1,8-dimethoxy-9-dimethoxymethylanthracene monocation.

| Normal modes                                                   | Primitive basis    | SPF     |
|----------------------------------------------------------------|--------------------|---------|
| $(\nu_1, \nu_9, \nu_{25}, \nu_{40}, \nu_{98})$                 | (9, 8, 7, 6, 7)    | [8, 10] |
| $(\nu_2, \nu_{27}, \nu_{32}, \nu_{34}, \nu_{95})$              | (8, 5, 7, 6, 8)    | [6, 8]  |
| $(\nu_6, \nu_{28}, \nu_{36}, \nu_{38}, \nu_{81})$              | (6, 6, 6, 6, 8)    | [7, 6]  |
| $(\nu_8, \nu_{23}, \nu_{43}, \nu_{59}, \nu_{79})$              | (8, 7, 6, 7, 8)    | [7, 9]  |
| $(\nu_{14}, \nu_{17}, \nu_{64}, \nu_{73}, \nu_{74}, \nu_{75})$ | (7, 8, 7, 6, 7, 6) | [7, 8]  |

**Table S6:** S<sub>1</sub>-S<sub>2</sub> minimum energy conical intersection (MECI) geometry of 1,8-dimethoxy-9-dimethoxymethylanthracene monocation optimized at TD-CAM-B3LYP/aug-cc-pVDZ level of theory using GRRM.

| Atom | Coordinates (Angstrom) |                 |                 |
|------|------------------------|-----------------|-----------------|
|      | X                      | Y               | Z               |
| C    | -0.000208792713        | 3.703740268953  | 0.750168733598  |
| C    | -0.000791692297        | 2.521341077847  | -0.007769772460 |
| C    | -0.000438206966        | 1.241229574776  | 0.626400275406  |
| C    | 0.000136290826         | 1.228665736782  | 2.060694355192  |
| C    | 0.000290024284         | 2.432450209142  | 2.793487956454  |
| C    | 0.000159249543         | 3.655623416338  | 2.139122714878  |
| C    | -0.000312360151        | -0.000003463007 | -0.090049973859 |
| C    | 0.000641040593         | 0.000000617721  | 2.738544605728  |
| C    | 0.000462702099         | -1.228666707126 | 2.060700000695  |
| C    | -0.000077399788        | -1.241234560410 | 0.626406882268  |
| C    | -0.000270766667        | -2.521342506374 | -0.007761985233 |
| C    | 0.000120103839         | -3.703744069358 | 0.750173917479  |
| C    | 0.000706391710         | -3.655625592810 | 2.139127537892  |
| C    | 0.000967227357         | -2.432452219239 | 2.793493207024  |
| H    | -0.000262037980        | 4.667740204938  | 0.251565434162  |
| H    | 0.000650758692         | 2.389927044361  | 3.881083619668  |
| H    | 0.000391567378         | 4.582372605727  | 2.709759740274  |
| H    | 0.001140941425         | 0.000003278081  | 3.827833390590  |
| H    | -0.000015417080        | -4.667744088447 | 0.251570965899  |
| H    | 0.001056590439         | -4.582374187189 | 2.709766063291  |
| H    | 0.001531631688         | -2.389929248071 | 3.881088926702  |
| O    | -0.000862571198        | -2.533086118600 | -1.344714113423 |
| O    | -0.001369891675        | 2.533090008474  | -1.344719653442 |
| C    | 0.000553181006         | -0.000006181987 | -1.559202836037 |
| O    | -1.086295623356        | -0.000270102274 | -2.314411375033 |
| O    | 1.088719413669         | 0.000318014404  | -2.312518838531 |
| C    | -2.366446708248        | 0.000583016716  | -1.681032097778 |
| H    | -3.092309236230        | 0.000169369124  | -2.495736609784 |
| H    | -2.496268256373        | -0.898077357678 | -1.067265031085 |
| H    | -2.495723690918        | 0.900280793051  | -1.068675808537 |
| C    | 2.368109878340         | -0.000585243880 | -1.677688993372 |
| H    | 2.497307139368         | 0.898033459701  | -1.063712468598 |
| H    | 2.496741141209         | -0.900308630799 | -1.065218405581 |
| H    | 3.094829038486         | -0.000137387723 | -2.491658487605 |
| C    | -0.001469041311        | -3.772031154709 | -2.059072879165 |
| H    | -0.002060397710        | -3.493338435215 | -3.114318412237 |
| H    | 0.899724960804         | -4.353004230750 | -1.828307441182 |
| H    | -0.902520321184        | -4.352799575049 | -1.827183642656 |
| C    | -0.001597833036        | 3.772035894728  | -2.059076763161 |
| H    | -0.001630230057        | 3.493343502762  | -3.114322285585 |
| H    | -0.902777196559        | 4.352802822404  | -1.827678447425 |
| H    | 0.899468398743         | 4.353010144636  | -1.827820155406 |

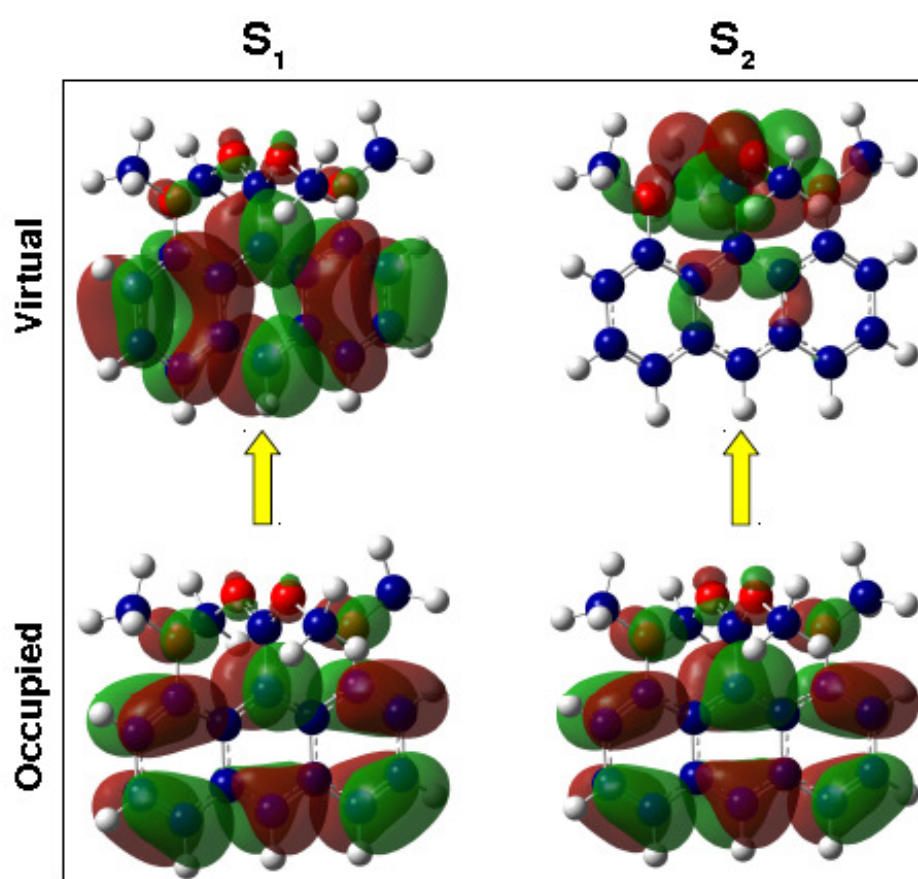

**Figure S1:** Natural transition orbitals (NTOs) showing major orbitals contributing towards excitation of 1,8-dimethoxy-9-dimethoxymethylantracene monocation obtained at TD-CAM-B3LYP/aug-cc-pVDZ level of theory.
